# Supplementary material for: Metal–Ceramic Compatibility in Dental Restorations According to the Metallic Component Manufacturing Procedure
Source: MDPI journal article supplement (doi:10.3390/ma16165556), 2023-08-10
Supplement: s1 [file s1]

**Table S1.** Vickers hardness test results

| Sample/method of obtaining | Hardness [HV5] | Mean value [HV5] | Standard deviation | Section      |
|----------------------------|----------------|------------------|--------------------|--------------|
| Cast Co-Cr                 | 267            | 250              | 16                 | Longitudinal |
|                            | 246            |                  |                    |              |
|                            | 237            |                  |                    |              |
| CAM Co-Cr                  | 258            | 257              | 3                  |              |
|                            | 259            |                  |                    |              |
|                            | 254            |                  |                    |              |
| SLM Co-Cr                  | 459            | 453              | 14                 |              |
|                            | 452            |                  |                    |              |
|                            | 449            |                  |                    |              |
| Cast Co-Cr                 | 253            | 248              | 13                 | Transversal  |
|                            | 257            |                  |                    |              |
|                            | 233            |                  |                    |              |
| CAM Co-Cr                  | 245            | 242              | 5                  |              |
|                            | 245            |                  |                    |              |
|                            | 236            |                  |                    |              |
| SLM Co-Cr                  | 371            | 395              | 23                 |              |
|                            | 395            |                  |                    |              |
|                            | 417            |                  |                    |              |
